# Supplementary material for: Integrating High-Resolution Mass Spectral Data, Bioassays and Computational Models to Annotate Bioactives in Botanical Extracts: Case Study – Analysis of <em>Centella asiatica</em> Extract Associates Di-Caffeoylquinic Acids with Protection against Amyloid-β Toxicity in an MC65 cell model
Source: Preprints.org preprint supplement (doi:10.20944/preprints202401.0202.v1), 2024-01-03
Supplement: Supplementary file 1 [file supplementary]

**Supplementary Materials**

Integrating high-resolution mass spectral data, bioassays and computational models to annotate bioactives in botanical extracts: Case Study - analysis of *Centella asiatica* extract associates dicaffeoylquinic acids with protection against amyloid-β toxicity in an MC65 cell model.

Armando Alcazar Magana1,2, Ashish Vaswani1, Kevin S. Brown3,4, Yuan Jiang5, Md Nure Alam1, Maya Caruso6, Parnian Lak1, Paul Cheong1, Nora Gray2,6, Joseph Quinn6,7, Amala Soumyanath2,6, Jan F. Stevens2,3,8, Claudia S. Maier1,2,8*

1 Department of Chemistry, Oregon State University, Corvallis, OR 97331, USA

2 BENFRA Botanical Dietary Supplements Research Center, Oregon Health and Science University, Portland, OR 97239, USA

3 Department of Pharmaceutical Sciences, Oregon State University, 1601 SW Jefferson Way, Corvallis, OR 97331, USA

4 School of Chemical, Biological, and Environmental Engineering, Oregon State University, 116 Johnson Hall, 105 SW 26th Street, Corvallis, OR 97331, USA

5 Department of Statistics, Oregon State University, Corvallis, OR 97331, USA

6 Department of Neurology, Oregon Health and Science University, Portland, OR 97239, USA

7 Parkinson’s Disease Research Education and Clinical Care Center, Veterans’ Administration Portland Health Care System, Portland, OR, USA

8 Linus Pauling Institute, Oregon State University, Corvallis, OR 97331, USA

***** Correspondence: [claudia.maier@oregonstate.edu](mailto:claudia.maier@oregonstate.edu)


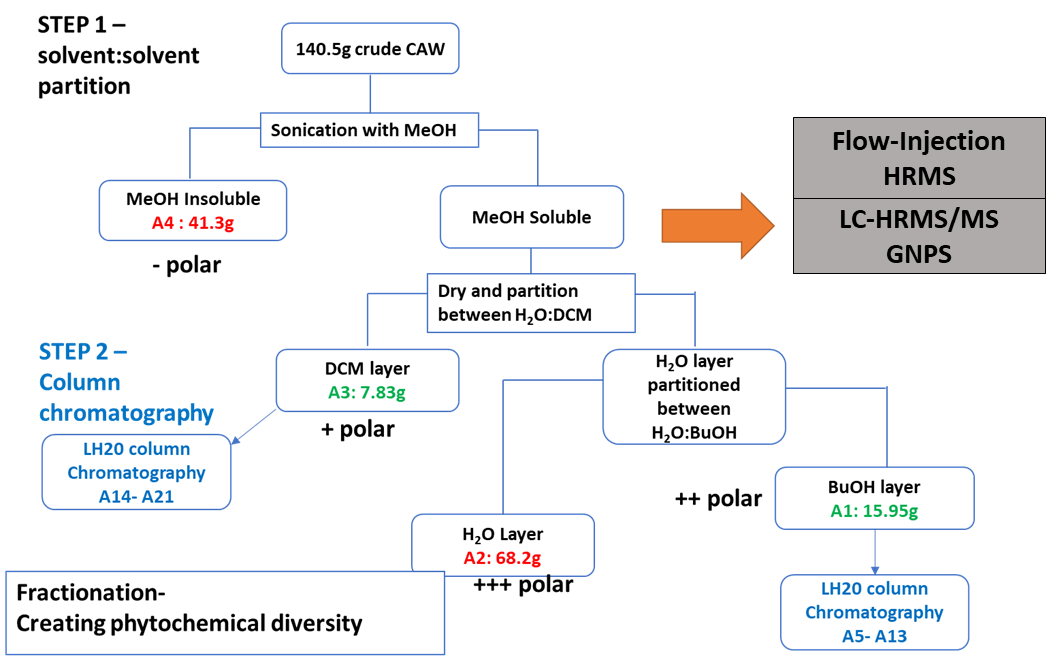


**Figure S1.** Fractionation scheme. 21 subfractions of CAW extract generated by solvent:solvent partitioning and LH-20 column chromatography. We analyzed each subfraction by flow-injection HRMS and correlated the features found with cytoprotective activity in an amyloid β-toxicity MC65 neuroblastoma cell model. In addition, CAW was analyzed by LC-HRMS/MS for obtaining precursor and fragment ion information for GNPS molecular network analysis. Relative polarity across fractions is indicated by “–“ and “+”.
